# Supplementary material for: Interactive Effects of Organic Fertilizers and Drought Stress on Growth and Nutrient Content of Brassica juncea at Vegetative Stage
Source: MDPI journal article supplement (doi:10.3390/su132413948), 2021-12-17
Supplement: s1 [file s1]

**Supporting Table S1:** Generalized regression model showing parameter estimates of relative treatment effects on response variables

(Morpho-physiological traits and nutrients content). The values indicate the Wald ChiSquare values.

| Term                      | RWC        | LA        | SPAD     | Height    | SBM       | RBM    | RSR      | MSI       |
|---------------------------|------------|-----------|----------|-----------|-----------|--------|----------|-----------|
| CH-UG                     | 0.52       | 306.06*** | 3.75     | 0.01      | 18.96***  | 9.82*  | 7.13*    | 352.73*** |
| (CH+HO)-UG                | 0.46       | 84.27***  | 39.83*** | 2.11      | 1.45      | 1.29   | 1.55     | 30.09***  |
| (CH+UG)-UG                | 30.44***   | 157.97*** | 0.54*    | 65.36***  | 1.19      | 0.13   | 0.07     | 488.81*** |
| (CH+UG+HO)-UG             | 15.62***   | 35.32***  | 93.29*** | 217.68*** | 22.60***  | 2.68   | 1.10     | 1438.8*** |
| HO-UG                     | 81.88***   | 182.11*** | 135.7*** | 0.12      | 6.44*     | 0.59   | 0.45     | 162.88*** |
| (HO+UG)-UG                | 13.27***   | 129.46*** | 63.88*** | 0.29      | 2.50      | 0.20   | 0.49     | 38.01**   |
| NF-UG                     | 1582.99*** | 209.99*** | 387.8*** | 0.31      | 19.18***  | 0.50   | 2.25     | 134.49*** |
| [SS-WW]                   | 390.61***  | 296.92*** | 891***   | 10.26***  | 131.90*** | 1.00   | 0.01     | 1356.9*** |
| [MS-SS]                   | 15.94***   | 29.46***  | 418.1*** | 0.82      | 22.64***  | 3.55   | 5.47     | 192.48*** |
| (CH-UG)*[SS-WW]           | 21.90***   | 0.03      | 4.41*    | 0.65      | 8.72*     | 1.11   | 0.95     | 3.29      |
| (CH-UG)*[MS-SS]           | 1.08       | 3.48      | 49.4***  | 0.58      | 4.95*     | 3.11   | 17.99*** | 57.15***  |
| [(CH+HO)-UG]*[SS-WW]      | 1.77       | 0.88      | 27.42*** | 3.65      | 3.26      | 2.36   | 10.93*** | 0.12      |
| [CH+HO-UG]*[MS-SS]        | 0.58       | 0.42      | 1.72     | 3.29      | 1.61      | 3.05   | 16.86*** | 0.98      |
| [CH+UG-UG]*[SS-WW]        | 31.85***   | 8.37*     | 67.93*** | 144.74*** | 1.94      | 0.14   | 0.13     | 20.72***  |
| [CH+UG-UG]*[MS-SS]        | 4.21*      | 1.31      | 1.17     | 62.75***  | 0.12      | 2.92   | 7.63*    | 2.26      |
| [(CH+UG+HO)-UG] * [SS-WW] | 29.92***   | 17.33***  | 45.46*** | 129.67*** | 9.20*     | 0.17   | 0.93     | 236.71*** |
| [CH+UG+HO-UG]*[MS-SS]     | 17.94***   | 29.13***  | 4.9*     | 12.73***  | 5.56      | 2.13   | 10.71    | 25.99***  |
| [HO-UG]*[SS-WW]           | 3.15       | 0.26      | 1.45     | 3.36      | 0.01      | 1.54   | 12.68*   | 4.66*     |
| [HO-UG]*[MS-SS]           | 1.27       | 35.34***  | 8.56     | 1.57      | 0.09      | 4.62*  | 28.13*** | 110.51*** |
| [(HO+UG)-UG]*[SS-WW]      | 1.94       | 0.21      | 36.34*** | 4.55*     | 8.57*     | 0.10   | 5.32*    | 20.7***   |
| [(HON+UG)-UG]*[MS-SS]     | 0.62       | 0.05      | 1.42     | 11.94***  | 7.49*     | 0.62   | 14.28*** | 16.66***  |
| [NF-UG]*[SS-WW]           | 113.41***  | 0.56      | 18.48*** | 72.49***  | 0.09      | 0.37   | 0.01     | 6.24      |
| [NF-UG]*[MS-SS]           | 1.17       | 0.42      | 44.53*** | 83.11***  | 2.09      | 0.49   | 4.07*    | 11.71**   |
| AIC                       | 408.53     | 282.41    | 226.2    | 308.33    | 334.43    | 576.41 | 83.72    | 256.16    |
| R <sup>2</sup>            | 0.9        | 0.99      | 0.99     | 0.97      | 0.97      | 0.49   | 0.73     | 0.99      |

Supporting Table 1 *continue*

| Factors                 | K         | Mg         | Na        | Ca       | Fe      | N        | C        | S       | P        | Cu    | Mn       | Zn       |
|-------------------------|-----------|------------|-----------|----------|---------|----------|----------|---------|----------|-------|----------|----------|
| CH-UG                   | 4.84***   | 49.74***   | 12.09***  | 221.8*** | 0.17    | 14.01*** | 1.09     | 0.22    | 2.66     | 0.38  | 1.28     | 28.82*** |
| (CH+HO)-UG              | 22.23***  | 45.97***   | 1623.2*** | 81.18*** | 0.48    | 0.17     | 1.95     | 3.41    | 0.58     | 0.13  | 4.3*     | 0.01     |
| (CH+UG)-UG              | 74.44***  | 724.83***  | 326.82*** | 85.29*** | 0.24    | 0.01     | 3.72     | 34.8*** | 3.02     | 0.46  | 4.17*    | 0.2      |
| (CH+UG+HO)-UG           | 133.64*** | 1379.79*** | 2535***   | 1.12     | 5.09*   | 0.05     | 7.07**   | 1.57    | 6.32*    | 0.11  | 7.63**   | 5.57*    |
| HO-UG                   | 9.92*     | 39.11**    | 41.42***  | 609.5*** | 0.18    | 3.56*    | 7.44**   | 0.01    | 2.84     | 0.15  | 8.19**   | 25.11*** |
| (HO+UG)-UG              | 158.34    | 516.32***  | 20.53***  | 187.6*** | 7.91*   | 3.21     | 7.55**   | 21.8*** | 0.41     | 0.18  | 0.23     | 2.37     |
| NF-UG                   | 56.84     | 152.7***   | 374.69*** | 38.91*** | 6.59*   | 38.76*** | 8.26**   | 0.36    | 38.54*** | 0.58  | 5.09*    | 0.21     |
| [SS-WW]                 | 23.4      | 615.83***  | 69.24***  | 787.1*** | 6.7*    | 129.3*** | 42.99*** | 11.5*** | 29.07*** | 0.67  | 26.88*** | 20.77*** |
| [MS-SS]                 | 32.1      | 55.43***   | 21.24***  | 209***   | 1.84    | 44.52*** | 49.22*** | 2.82    | 2.66     | 0.04  | 7.69**   | 7.73**   |
| (CH-UG)*[SS-WW]         | 62.97     | 3.95*      | 3.91*     | 40.72*** | 0.01    | 5.62*    | 49.74*** | 0.2     | 25.66*** | 0.06  | 0.25     | 44.05*** |
| (CH-UG)*[MS-SS]         | 53.24     | 0.65       | 0.8       | 37.69*** | 0.41    | 1.38     | 55.52*** | 0.18    | 15.61*** | 0.01  | 0.03     | 9.29***  |
| [(CH+HO)-UG]*[SS-WW]    | 0.68      | 3.15       | 432.52*** | 21.02*** | 0.58    | 0.23     | 64.17*** | 2.44    | 1.12     | 0.04  | 1.41     | 3.18     |
| [CH+HO-UG]*[MS-SS]      | 5.02*     | 0.05       | 82.14***  | 27.73*** | 0.05    | 5.8**    | 65.67*** | 0.01    | 0.01     | 0.01  | 0.35     | 1.12     |
| [CH+UG-UG]*[SS-WW]      | 12.87     | 255.23***  | 63.75***  | 38.09*** | 0.01    | 0.07     | 66.03*** | 16.7*** | 19.59*** | 0.06  | 0.72     | 4.76*    |
| [CH+UG-UG]*[MS-SS]      | 2.78      | 24.76***   | 76.98***  | 17.33*** | 0.22    | 1.07     | 68.35*** | 3.85*   | 13.02*** | 6.41* | 1.08     | 2.56     |
| [(CH+UG+HO)-UG]*[SS-WW] | 0.23      | 203.92***  | 296.49*** | 0.07     | 2.95    | 0.01     | 76.74*** | 0.04    | 35.06*** | 0.06  | 5.3*     | 28.04*** |
| [CH+UG+HO-UG]*[MS-SS]   | 0.49      | 110.9***   | 77.22***  | 7.11*    | 0.45    | 0.54     | 84.29*** | 0.38    | 4.96*    | 0.01  | 1.21     | 11.34*** |
| [HO-UG]*[SS-WW]         | 50.62***  | 14.92***   | 1.66      | 209.4*** | 0.01    | 3.61     | 142.9*** | 6.78**  | 29.72*** | 0.01  | 1.41     | 54.15*** |
| [HO-UG]*[MS-SS]         | 7.64*     | 1.51       | 1.75      | 47***    | 0.13    | 1.03     | 172.2*** | 2.35    | 59.47*** | 0.001 | 0.33     | 9.49***  |
| [(HO+UG)-UG]*[SS-WW]    | 136.9***  | 91.11***   | 0.15      | 85.54*** | 29.3*** | 0.22     | 189.9*** | 11.4*** | 2.03     | 0.01  | 0.02     | 2.86     |
| [(HO+UG)-UG]*[MS-SS]    | 37.76***  | 8.34*      | 0.85      | 22.66*** | 18.3*** | 0.03     | 193.5*** | 0.01    | 2.41     | 0.01  | 0.38     | 1.5      |
| [NF-UG]*[SS-WW]         | 2.13      | 38.89***   | 121.7***  | 0.71     | 2.03    | 15.41*** | 203.5*** | 0.01    | 13.81*** | 0.01  | 1.76     | 33.18*** |
| [NF-UG]*[MS-SS]         | 2.34      | 0.07       | 111.5***  | 14.4***  | 0.07    | 6.67**   | 1359***  | 0.05    | 11.44*** | 0.04  | 1.28     | 13.4***  |
| AIC                     | 442.55    | 162.92     | 217.29    | 230.1    | 312     | 193.1    | 358.9    | 108     | 209.8    | 127.5 | 135.5    | 89.05    |
| R Square                | 0.97      | 0.99       | 0.98      | 0.99     | 0.64    | 0.96     | 0.98     | 0.86    | 0.96     | 0.35  | 0.75     | 0.81     |

Where, CH = Chitosan, UG = ultra-green, HO = homegrown organic nutrition, SS=severe stress, MS = moderate stress, WW = well-watered, WC = relative water content, LA = leaf area, MSI = membrane stability index, RSR root to shoot ratio, AIC = Akaike information criterion, RWC = relative water content, LA = leaf area, MSI = membrane stability index, SBM = Shoot Biomass, RBM = root biomass, and RSR root to shoot ratio. \*\* = highly significantly ( $p \leq 0.001$ ) and \* = as significantly ( $p \leq 0.05$ ) different.
